# Supplementary material for: Zebrafish knockout of Down syndrome gene, DYRK1A, shows social impairments relevant to autism
Source: PubMed Central journal article supplement (PMC5622473; doi:10.1186/s13229-017-0168-2), 2017-09-29

# Additional file 1: Figure S1

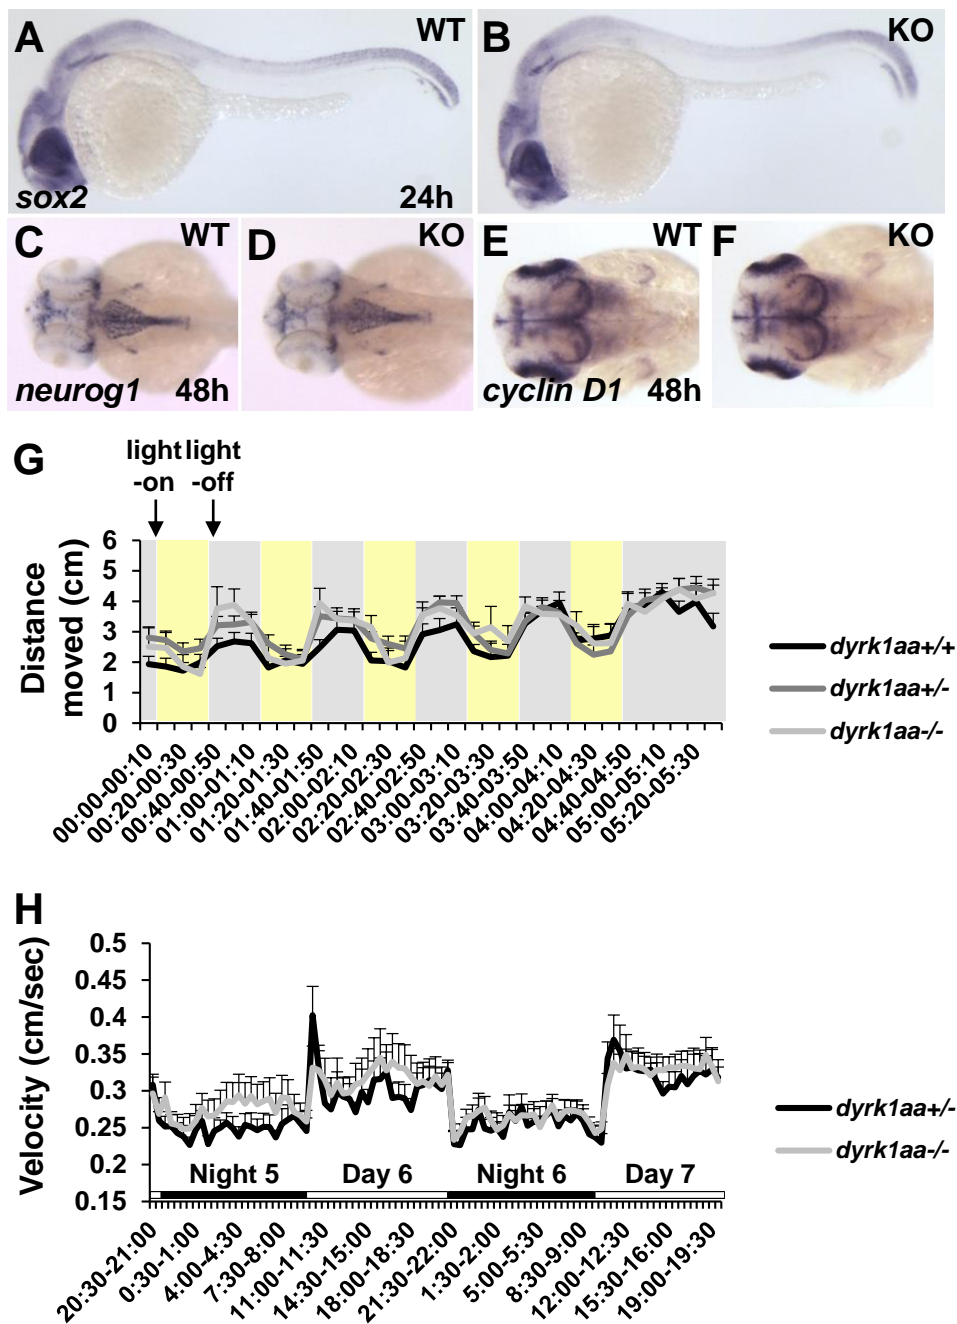

Supplement: 13229_2017_168_MOESM1_ESM.pdf [file 13229_2017_168_MOESM1_ESM.pdf]
