# Supplementary material for: Zebrafish knockout of Down syndrome gene, DYRK1A, shows social impairments relevant to autism
Source: Springer Nature journal article supplement (doi:10.1186/s13229-017-0168-2), 2017-09-29

# Additional file 8: Figure S8

**A**

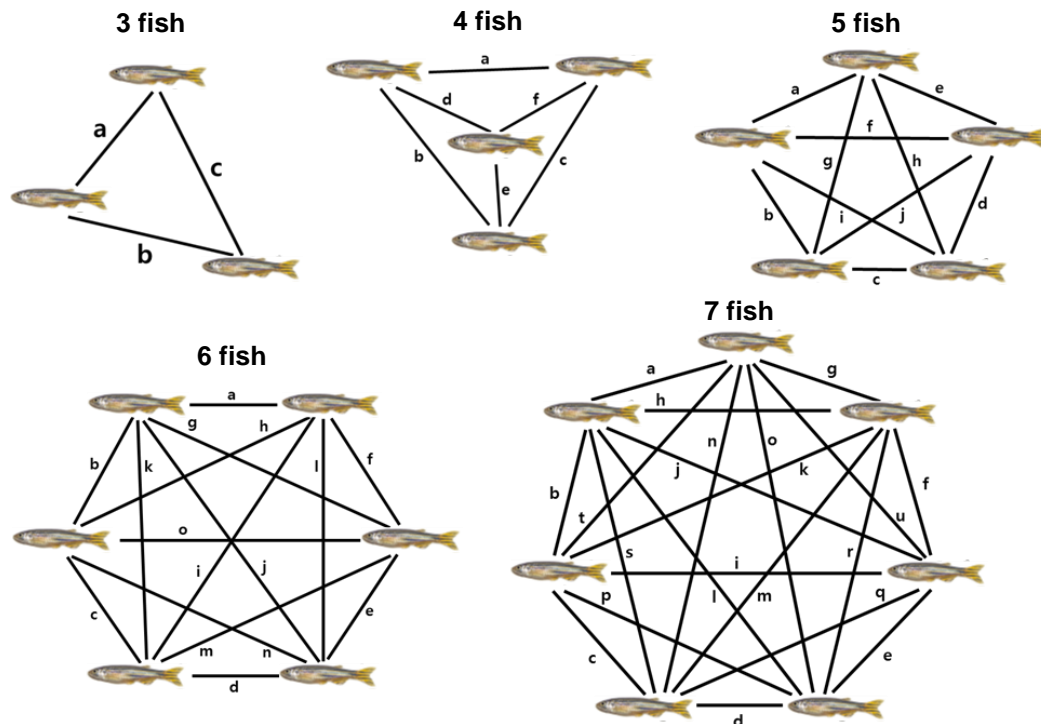

**B**

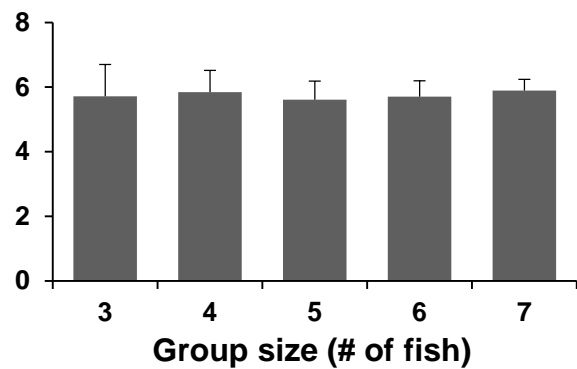

**C**

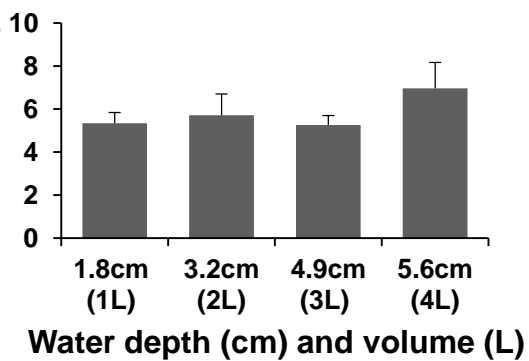

Supplement: MOESM10 [file 15095044]
